# Supplementary material for: Multi-omics and spatial transcriptomics identify KCMF1 as an immune-metabolic driver of hepatocellular carcinoma progression
Source: Discov Oncol. 2026 May 12;17:986. doi: 10.1007/s12672-026-05188-6 (PMC13338117; doi:10.1007/s12672-026-05188-6)
Supplement: Supplementary file 1 — Supplementary Material 1. [file 12672_2026_5188_MOESM1_ESM.xlsx]

## Sheet: Sheet1
Supplementary table1. The K48 and K63 ubiquitin chain-associated gene sets.
K48 gene	K63 gene
TOPORS	STUB1
MARCHF6	TRIM22
ANAPC10	ARIH2
ARIH2	UBE2E3
TRIM38	TRIM3
UBE2E3	TRAF3IP2
UBE2C	WWP2
TRIM31	TRIM31
GABARAP	DDX3X
RFFL	RNF168
TRIM6	TRIM65
ANAPC16	RNF152
RNF187	TRIM32
DTX3L	UBR2
FBXO45	SASH1
TRIM65	PELI3
RNF152	HECTD1
ZNRF2	RNF167
TRIM32	PTPN22
NT5C2	RNF115
TCF25	UBE2S
MYCBP2	PRPF19
DTX4	GPS2
NEDD4L	UBE2T
UBR4	BIRC2
CDC26	XIAP
FBXO7	UBE2NL
ANAPC13	MIR138-1
ANAPC15	NBN
KBTBD2	NEDD4
KLHL3	PRKN
FBXO9	BFAR
AMFR	UBE2D4
RNF115	RNF186
UBE2T	MAGEL2
ANAPC2	RNF126
ANAPC4	KCMF1
UBE2K	PELI1
BIRC2	RNF213
IFI27	TRIM27
PRKN	RNF4
BFAR	RNF5
UBR5	UBE2O
ANAPC5	NOD2
ANAPC7	SKP2
ANAPC11	TRIM21
UBE2D4	TRAF1
RNF216	TRAF2
TRIM44	TRAF3
PPIA	TRAF5
UBE2R2	TRAF6
RNF126	UBE2B
KCMF1	UBE2E2
PELI1	UBE2G1
HACE1	UBE2N
RNF4	UBE2V1
RNF5	UBE2V2
RNF6	CEP63
ANAPC1	ZFP91
SKP1	TRIM8
SKP2	TRIM56
TRIM21	ITCH
TNFAIP3	RNF135
TTC3	PARP10
UBE2A	TRIM5
UBE2B	RIPK2
UBE2D1	RNF8
UBE2D2	ZNF598
UBE2D3	ARRDC4
UBE2E1	PLAA
UBE2E2
UBE2G1
UBE2G2
UBE2H
UBE3A
TRIM25
RNF34
TRIM45
FBXO38
RNF170
RNF146
ITCH
KBTBD7
SYVN1
CUL3
CUL1
TRIM55
ZNRF1
CDC23
CDC16
BTRC
KBTBD6
RNF8
NMI
UBE2Q2
UBE3C
CDC27
CDC34
RBX1
